# Supplementary material
Source: PubMed Central journal article supplement (PMC6716162)

# Family C10

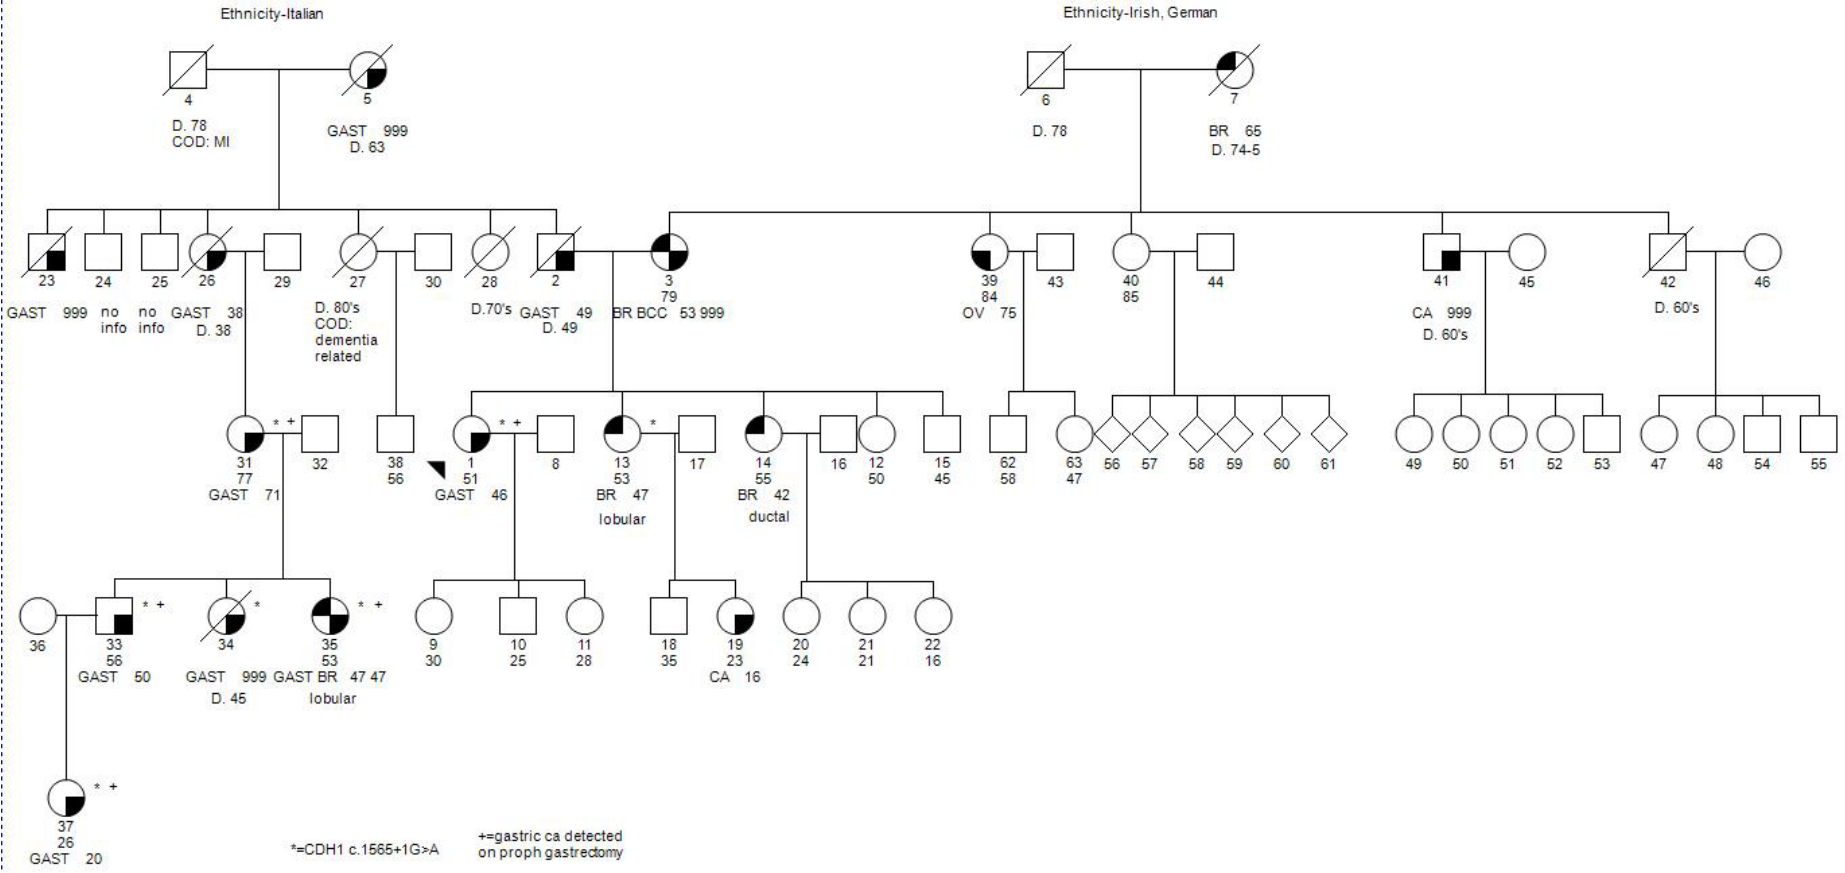

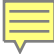

# Family C8

C0008  
5/3/2018

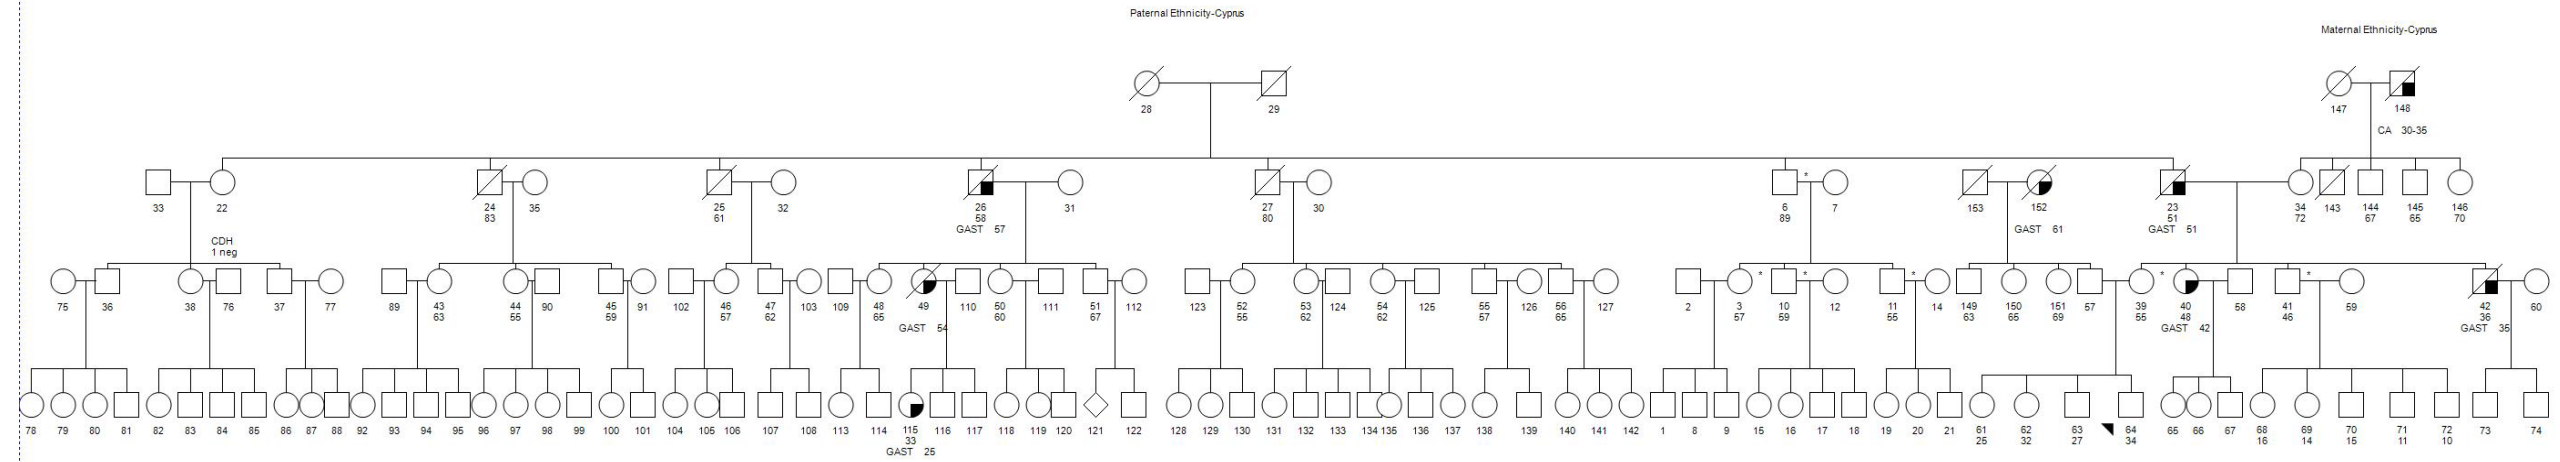

\*CDH1 c.2295>2T>G

# Family C11

C0011  
5/3/2018

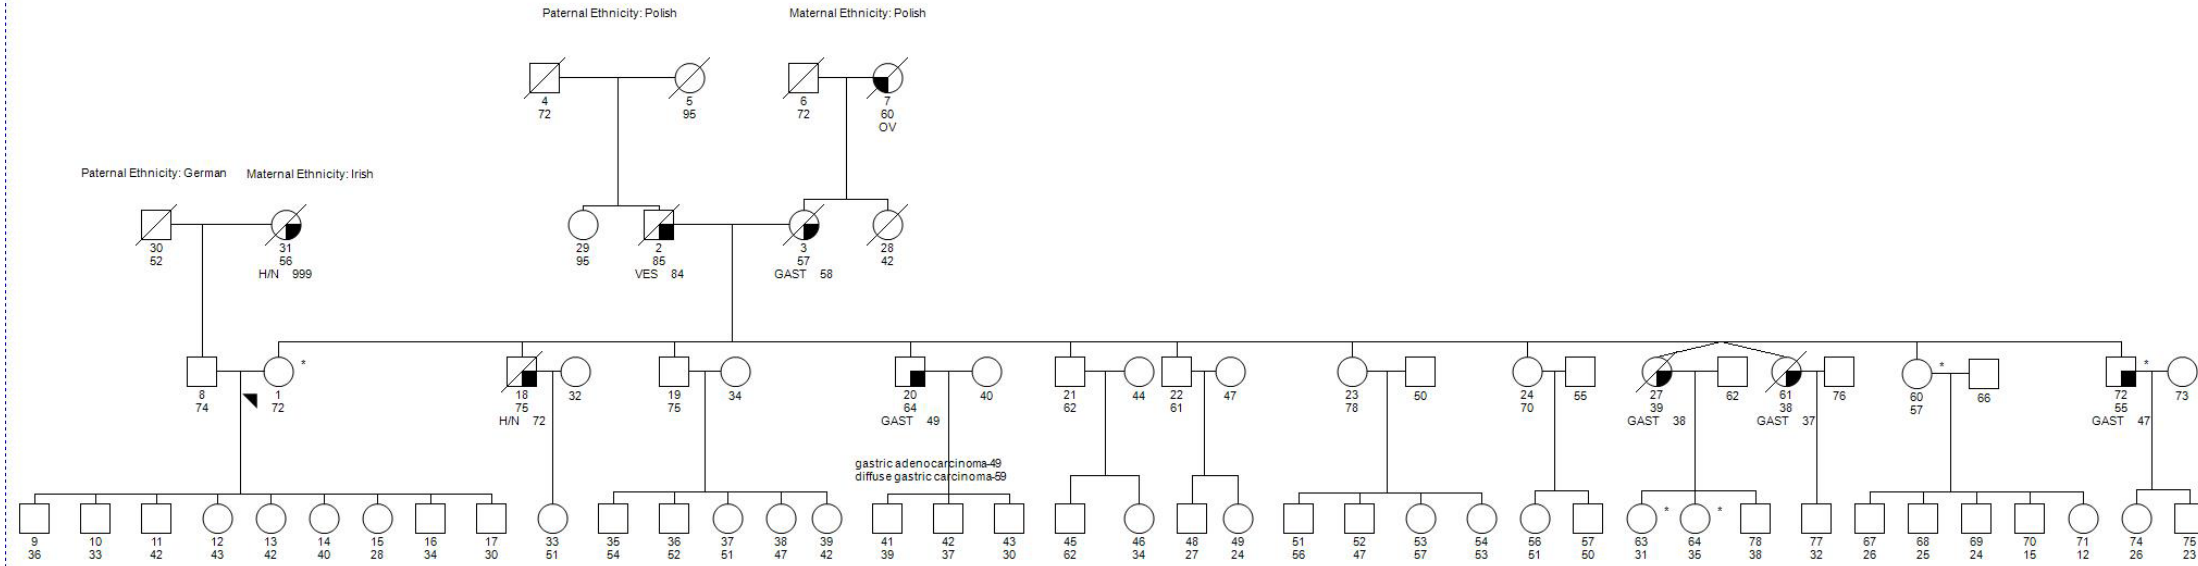

\*=CDH1 c.521dupA

# Family C9

Ethnicity-Middle Eastern, Mesopotamia

Ethnicity-Middle Eastern, Mesopotamia

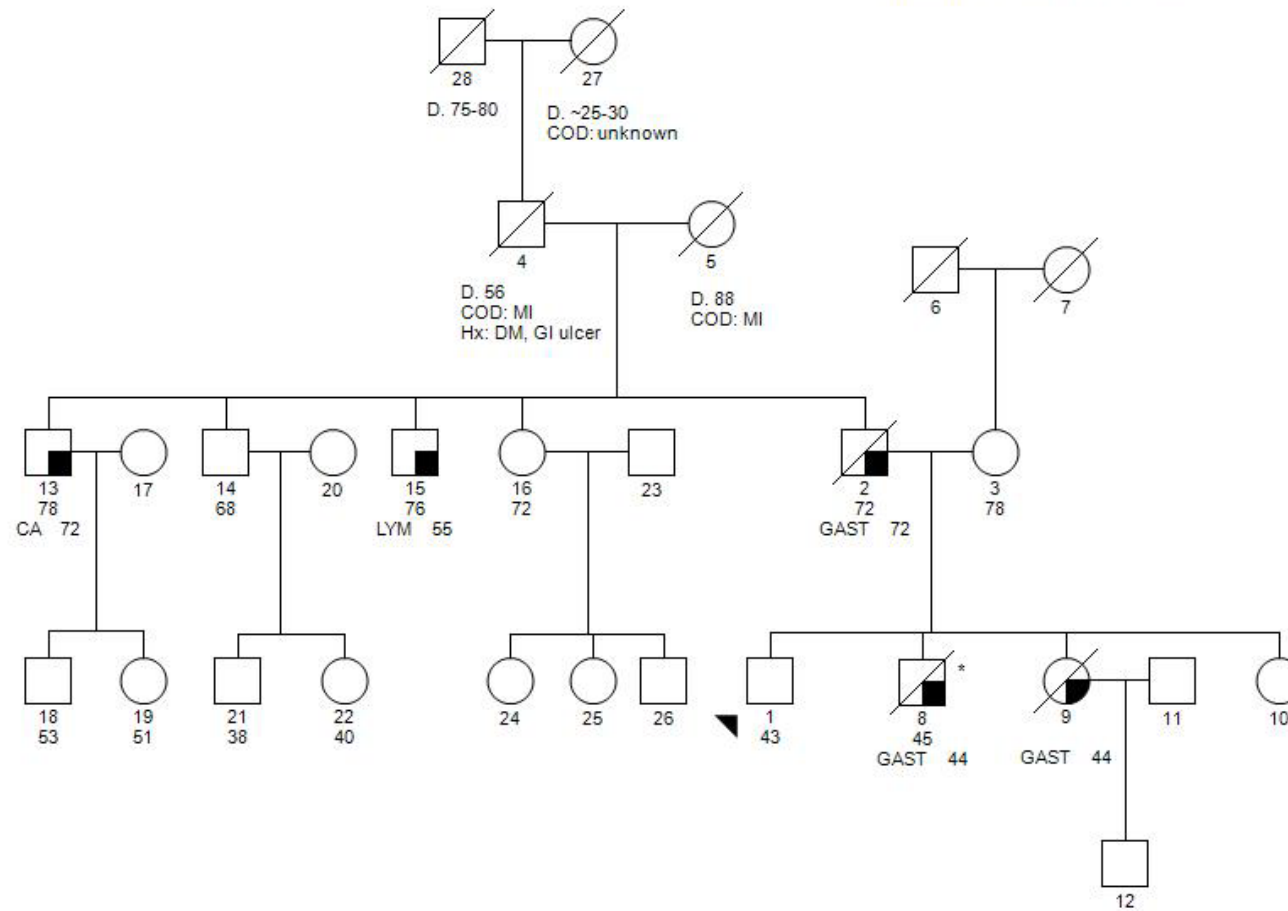

\*=CDH1 c.1380delA

# Family C14

C0014

5/4/2018

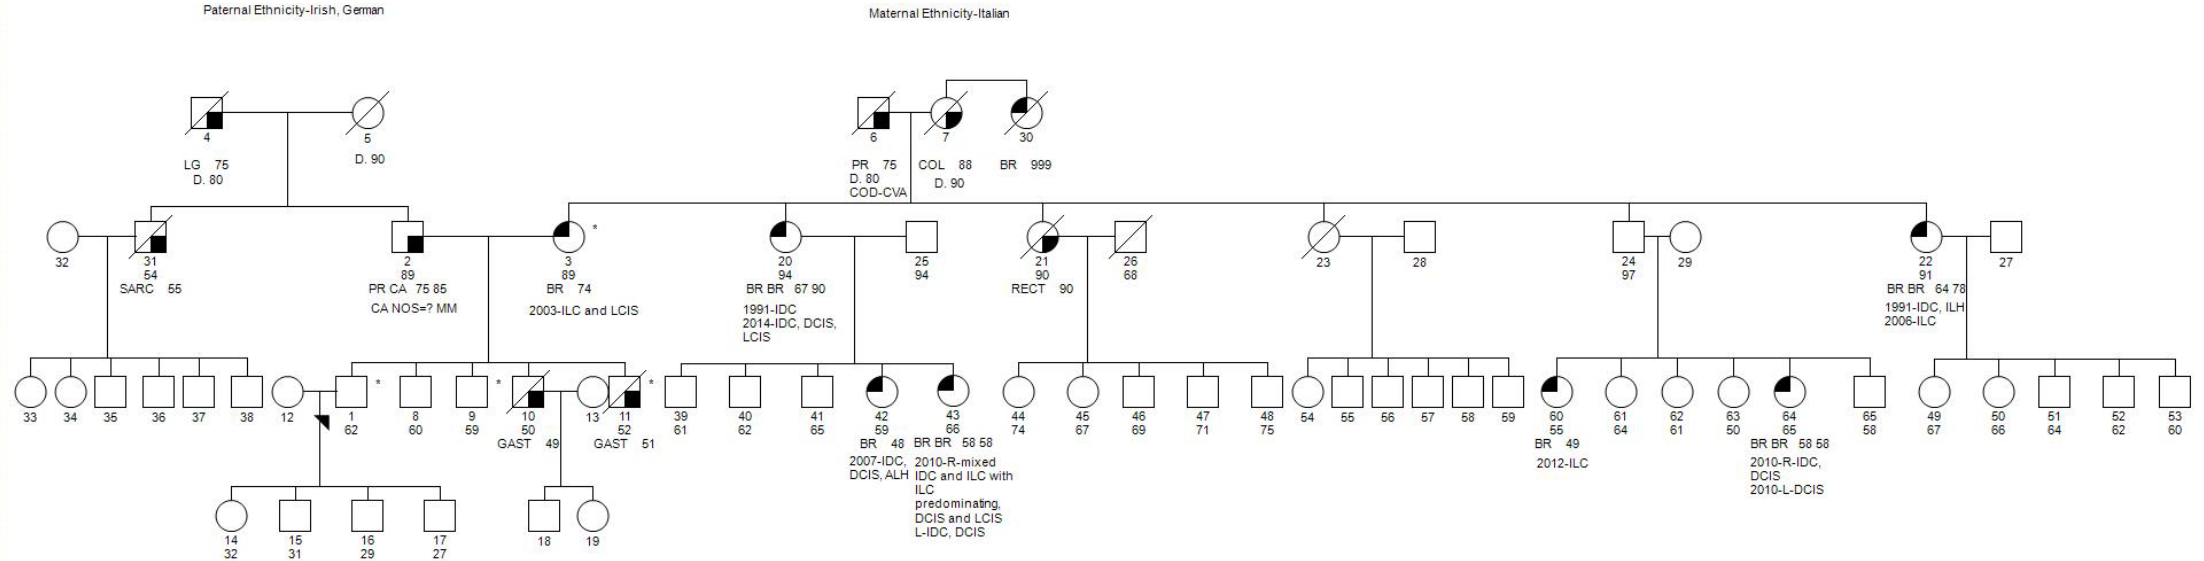

\*=CDH1p.G571S (c.1711G>A)

# Family C21

0/19/2017

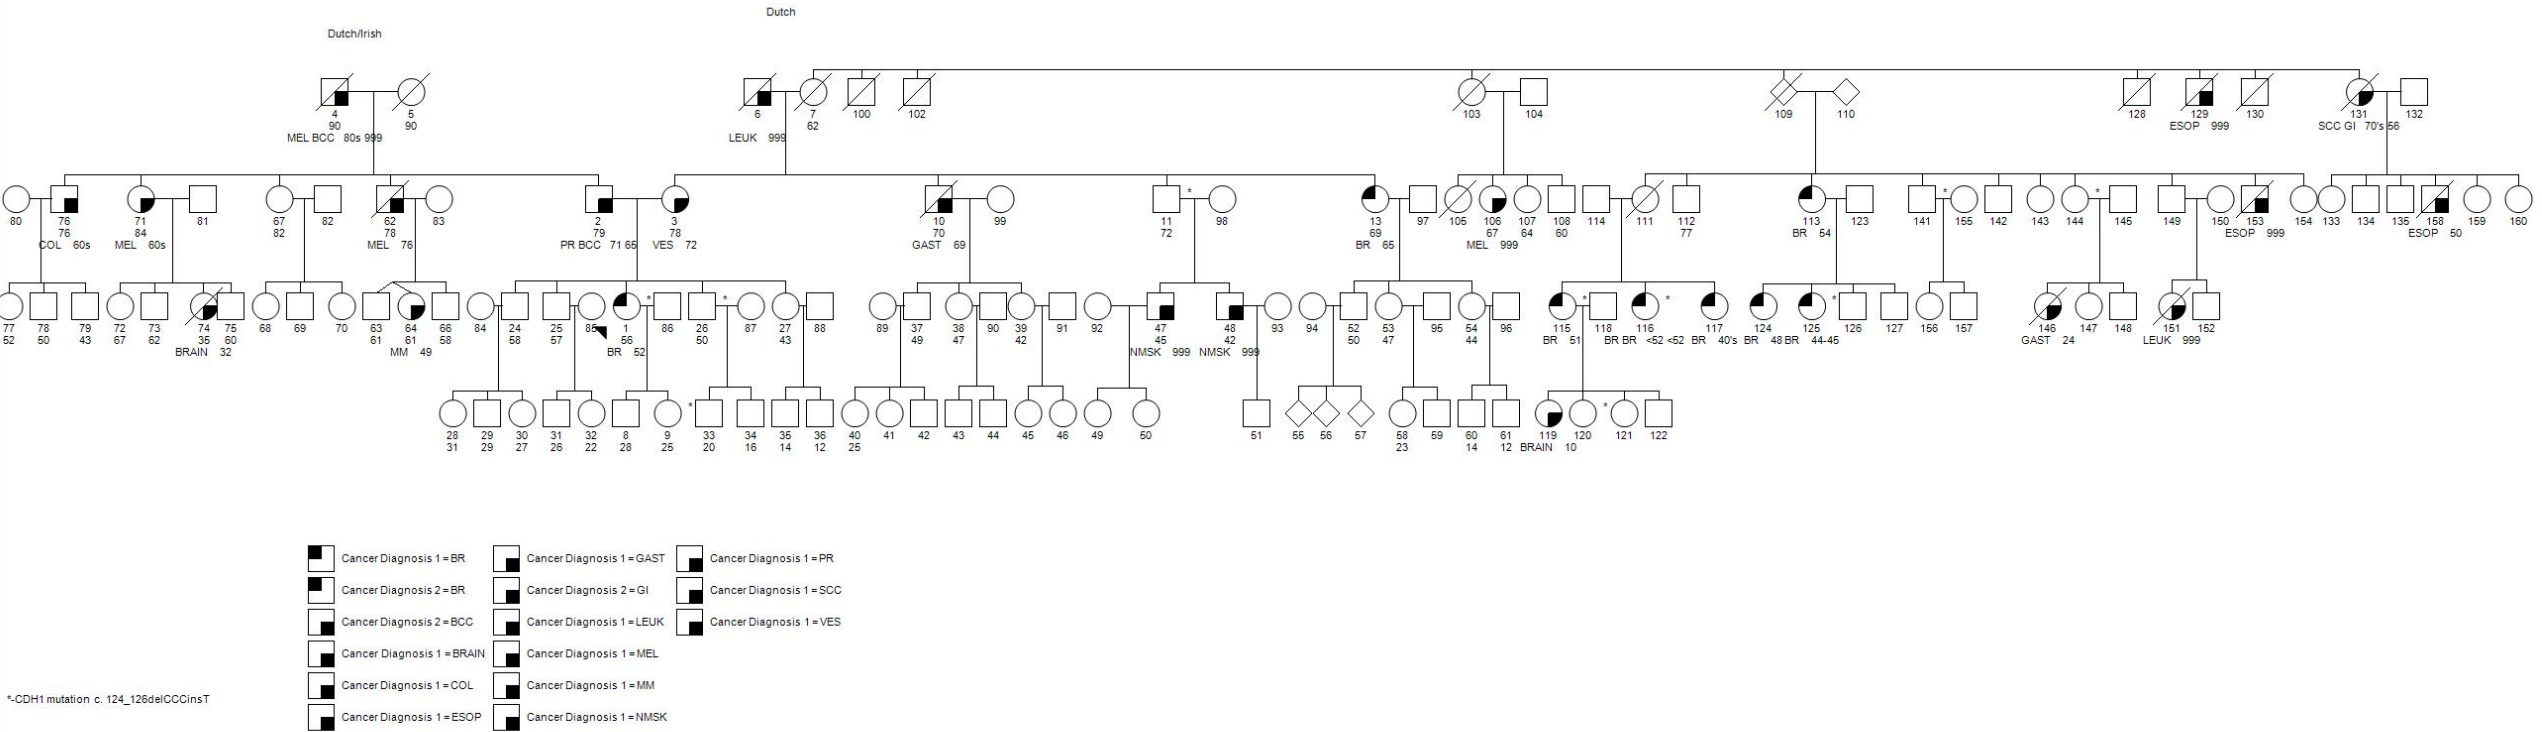

Supplement: NIHMS1041025-supplement-Fig_S2.pdf [file NIHMS1041025-supplement-Fig_S2.pdf]
