# Supplementary material
Source: PubMed Central journal article supplement (PMC6716162)

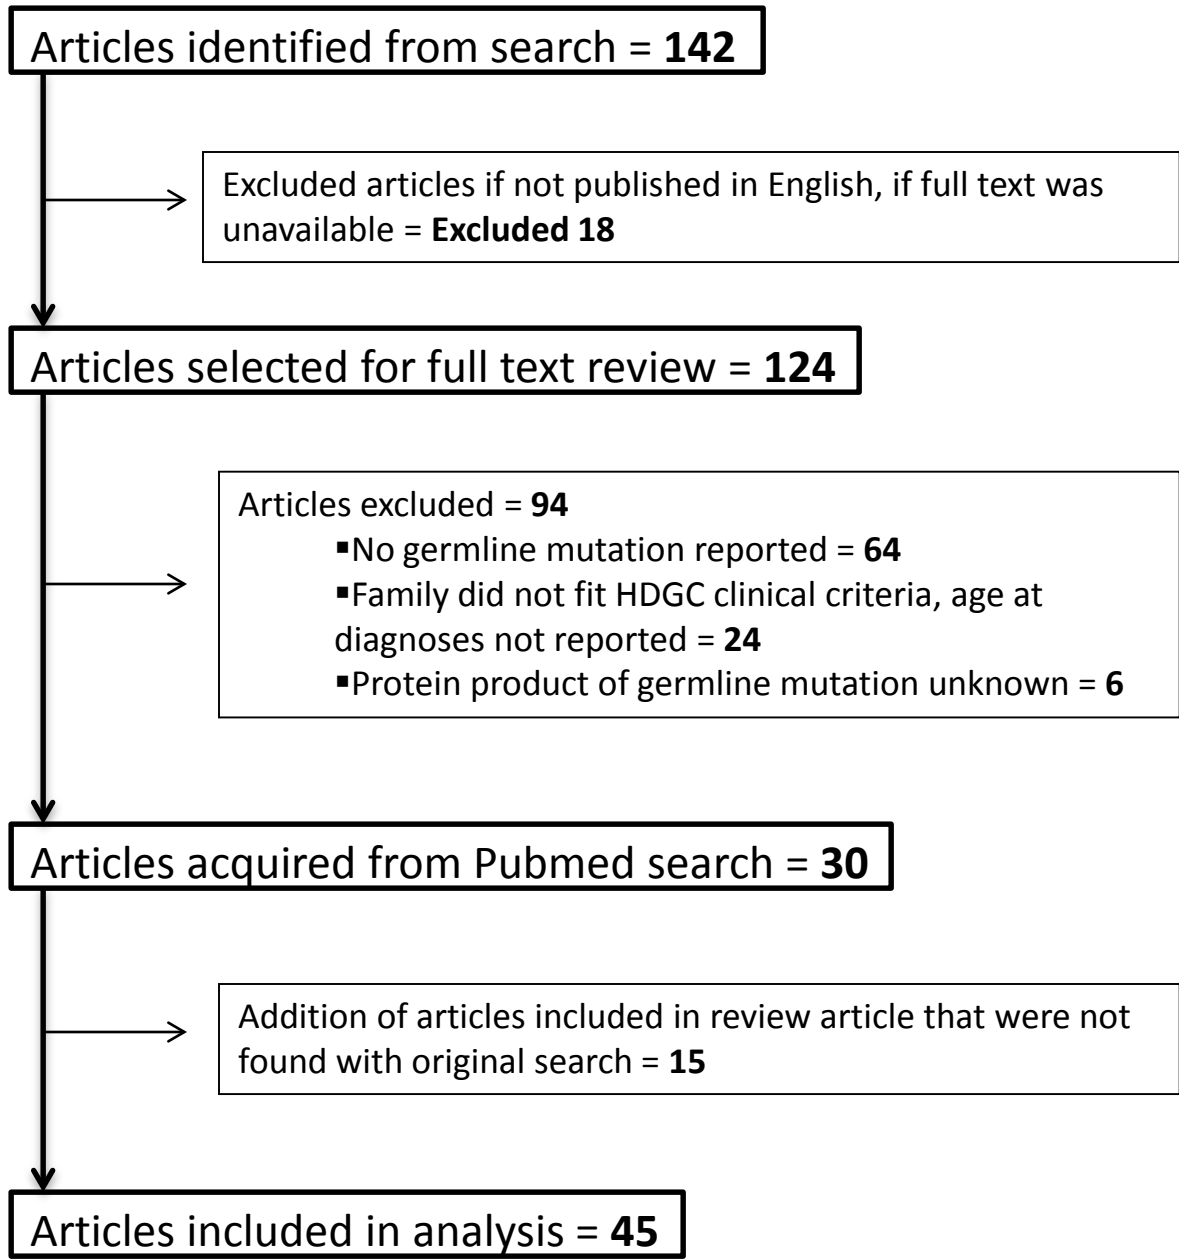

Supplement: NIHMS1041025-supplement-Fig_S1.pdf [file NIHMS1041025-supplement-Fig_S1.pdf]

Supplemental Figure 4A

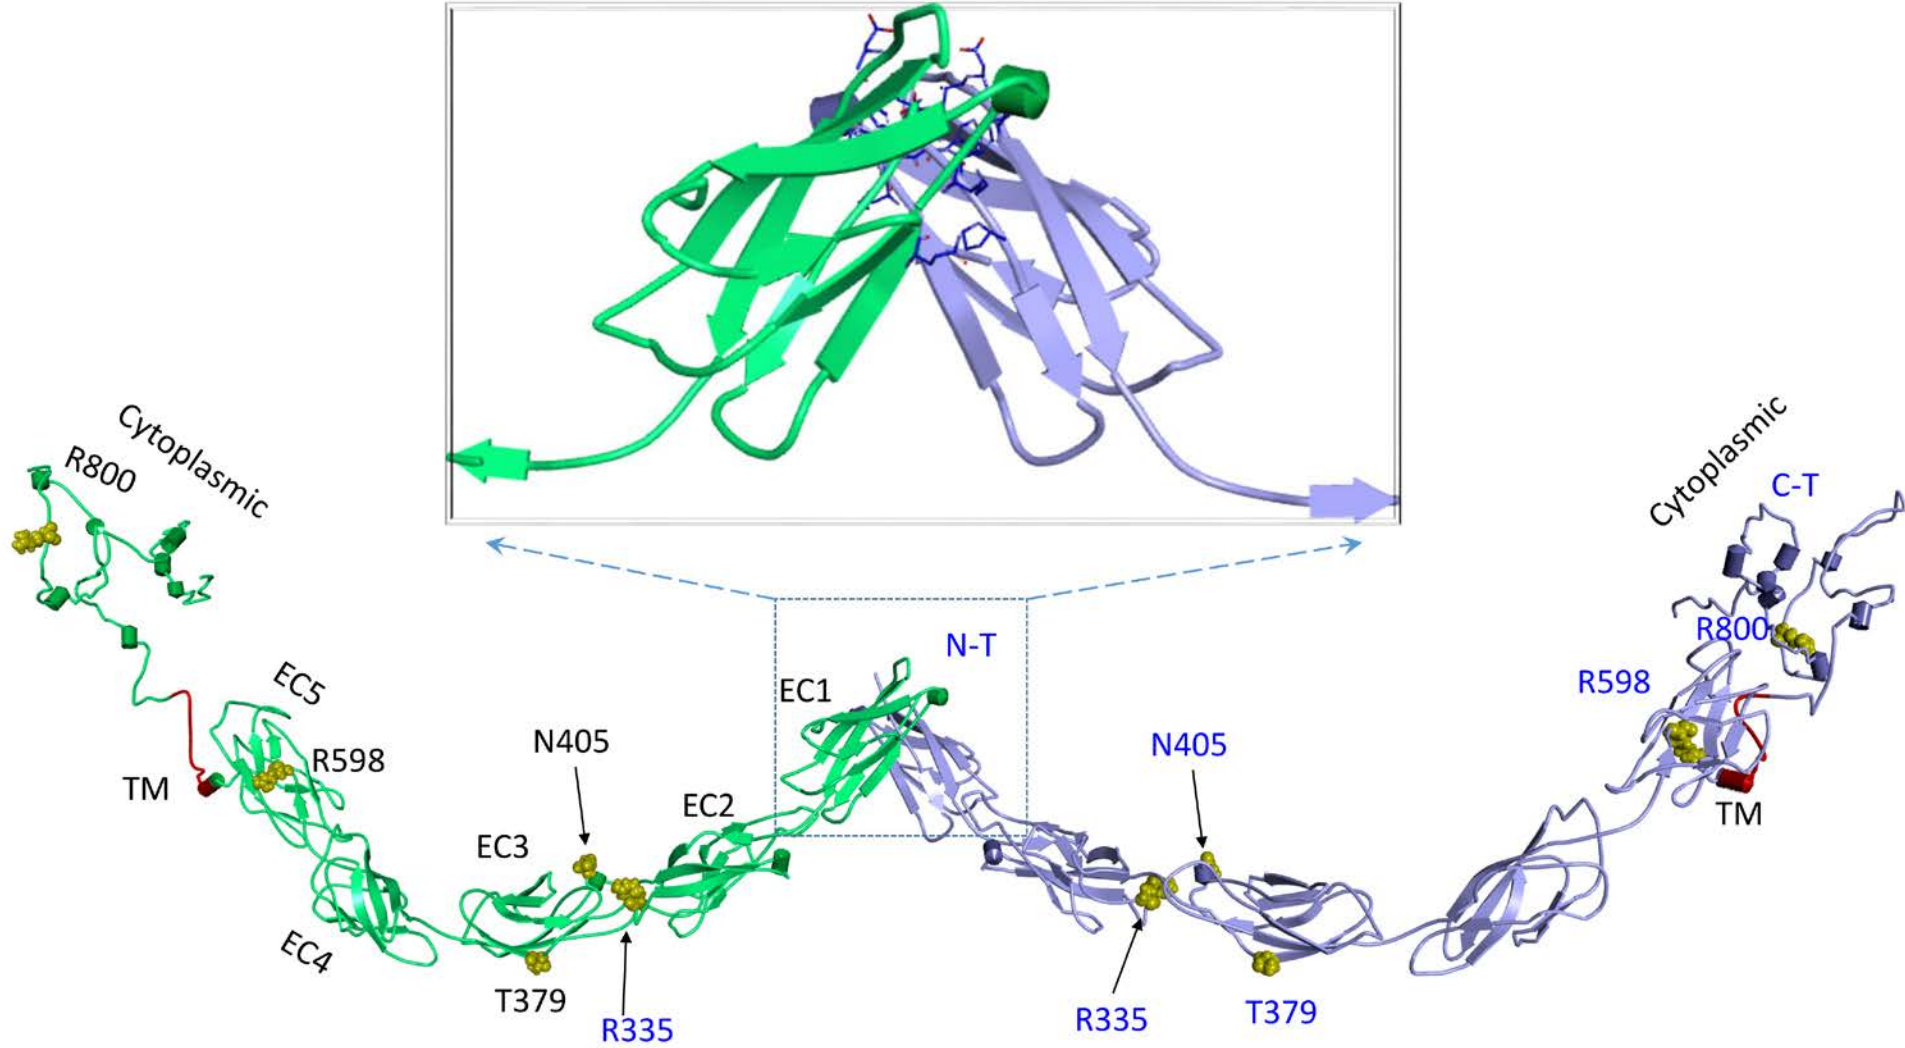

Supplemental Figure 4B

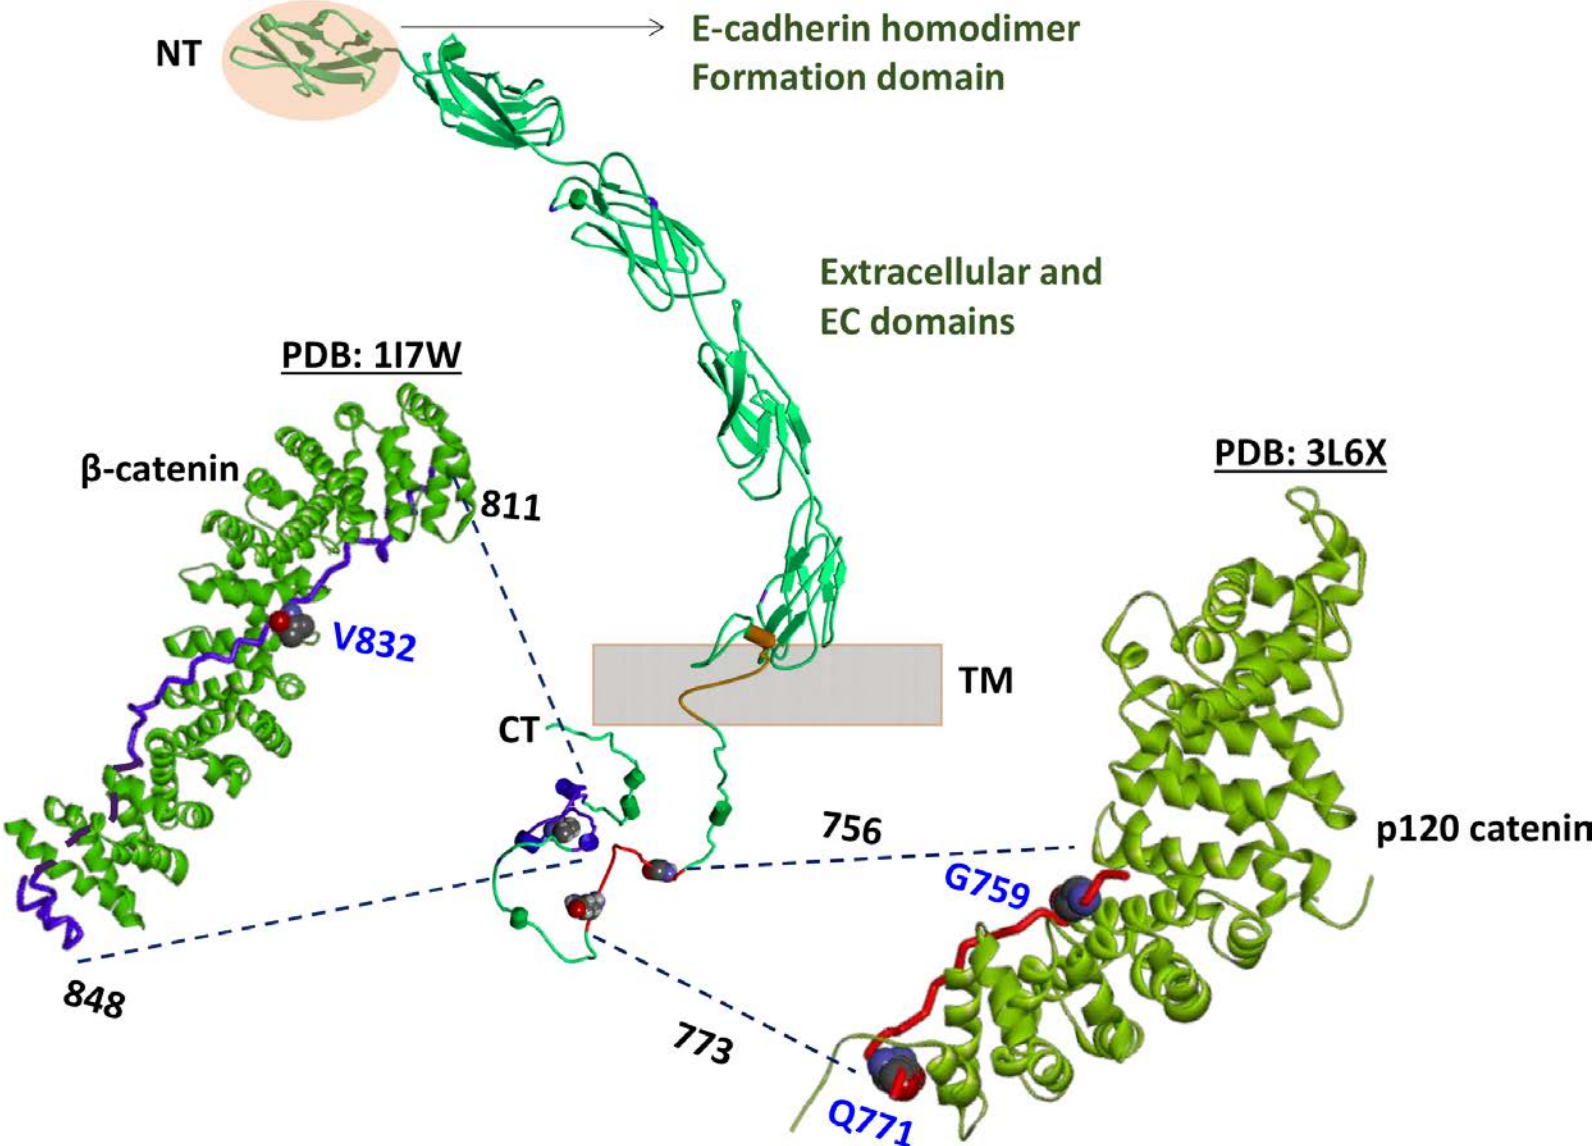

Supplement: NIHMS1041025-supplement-Fig_S4.pdf [file NIHMS1041025-supplement-Fig_S4.pdf]
